# Supplementary material for: The Outcome of COVID-19 Lockdown on Changes in Body Mass Index and Lifestyle among Croatian Schoolchildren: A Cross-Sectional Study
Source: Nutrients. 2021 Oct 26;13(11):3788. doi: 10.3390/nu13113788 (PMC8624838; doi:10.3390/nu13113788)
Supplement: Supplementary file 1 [file nutrients-13-03788-s001.zip › nutrients-1408685-supplementary.pdf]

Table S1. Correctly answered nutrition knowledge score items among schoolchildren (N=1370) according to gender (%).

| Question                                                                     | Boys (N=639) | Girls (N=731) | p-value* |
|------------------------------------------------------------------------------|--------------|---------------|----------|
| How many pieces of fruit a child of your age should eat every day?           | 88.3         | 89.5          | 0.825    |
| How many daily meals of vegetables a child of your age should eat every day? | 62.8         | 69.4          | 0.370    |
| Mark what you consider as a healthy breakfast.                               | 87.6         | 93.2          | 0.228    |
| Mark what you consider as a healthy meal.                                    | 95.2         | 96.7          | 0.470    |
| Which of the following food group should you eat the most in a day?          | 90.3         | 93.4          | 0.447    |
| Which food group should you eat the least?                                   | 83.4         | 90.2          | 0.147    |
| Which food group is a good source of vitamin C?                              | 75.3         | 79.9          | 0.397    |
| Which food group is a good source of energy?                                 | 50.9         | 48.6          | 0.777    |
| Which food group is a good source of calcium?                                | 59.8         | 62.1          | 0.772    |
| Which food group provides the most protein?                                  | 75.3         | 73.6          | 0.747    |
| Which food group is a good source of fibers?                                 | 12.1         | 14.4          | 0.674    |
| Which of the following nutrients gives the most energy?                      | 23.9         | 24.4          | 0.962    |
| How much water should we drink each day?                                     | 87.0         | 92.5          | 0.157    |
| How much should children be physically active each day?                      | 73.1         | 66.8          | 0.355    |

\*Chi-squared test for differences between boys and girls (p < 0.05).

Table S2. Schoolchildren' feelings and worries about COVID-19 lockdown and staying at home (%).

|                                                         | Boys (N=639)   |                          |                      | Girls (N=731)  |                          |                      | Total (N=1370) |                          |                      | p-value |
|---------------------------------------------------------|----------------|--------------------------|----------------------|----------------|--------------------------|----------------------|----------------|--------------------------|----------------------|---------|
|                                                         | No; not at al. | Neither no, neither yes. | Yes; definitely yes. | No; not at al. | Neither no, neither yes. | Yes; definitely yes. | No; not at al. | Neither no, neither yes. | Yes; definitely yes. |         |
| I feel lonelier.                                        | 57.6           | 23.3                     | 19.1                 | 47.3           | 32.8                     | 19.8                 | 52.1           | 28.3                     | 19.5                 | <0.001  |
| I feel happier.                                         | 37.4           | 32.1                     | 30.5                 | 41.6           | 31.2                     | 27.2                 | 39.5           | 31.7                     | 28.8                 | <0.001  |
| I miss my school friends.                               | 16.6           | 18.8                     | 64.6                 | 18.1           | 21.3                     | 60.6                 | 17.3           | 20.2                     | 62.5                 | <0.001  |
| I feel more successful in my learning.                  | 38.2           | 31.3                     | 30.7                 | 39.4           | 30.4                     | 30.2                 | 38.8           | 30.8                     | 30.4                 | <0.001  |
| I'm afraid to go back to school, I rather stay at home. | 55.1           | 19.9                     | 25.0                 | 45.1           | 25.0                     | 29.8                 | 49.9           | 22.6                     | 27.6                 | <0.001  |

\*Chi-squared test for differences between boys and girls (p < 0.05).
